# Supplementary material for: Comparative chloroplast genomes of Paris Sect. Marmorata: insights into repeat regions and evolutionary implications
Source: PubMed Central journal article supplement (PMC6311911; doi:10.1186/s12864-018-5281-x), 2018-12-31
Supplement: 12864_2018_5281_MOESM1_ESM.pdf [file 12864_2018_5281_MOESM1_ESM.pdf]

**Table S1.** Summary of chloroplast genome characteristics of Sect. *Marmorata*.

| <b>Genome feature</b>    | <b><i>P. marmorata</i></b> | <b><i>P. luquanensis</i></b> |
|--------------------------|----------------------------|------------------------------|
| Total length (bp)        | 157,629                    | 157,643                      |
| LSC length (bp)          | 84,059                     | 84,028                       |
| SSC length (bp)          | 18,529                     | 18,393                       |
| IR length (bp)           | 27,521                     | 27,611                       |
| Protein-coding genes(bp) | 93,958                     | 93,968                       |
| Ribosomal RNAs(bp)       | 9,052                      | 9,050                        |
| Transfer RNAs(bp)        | 10,833                     | 10,817                       |
| Introns(bp)              | 19,878                     | 19,886                       |
| Spacers(bp)              | 23,908                     | 23,922                       |
| A+T content (%)          |                            |                              |
| LSC                      | 64.28                      | 64.25                        |
| SSC                      | 68.70                      | 70.10                        |
| IR                       | 58.08                      | 61.10                        |
| Genome                   | 62.64                      | 62.62                        |
| Protein-coding genes     | 59.93                      | 59.92                        |
| Transfer RNA genes       | 53.28                      | 53.27                        |
| Ribosomal RNA genes      | 45.02                      | 45.02                        |
| Total number of genes    | 133                        | 133                          |
| Transfer RNAs            | 38                         | 38                           |
| Ribosomal RNAs           | 8                          | 8                            |
| Protein coding genes     | 87                         | 87                           |
| Genes duplicated in IRa  | 20                         | 20                           |

**Table S2.** List of gene function in the chloroplast genomes.

| Category         | Gene group                          | Gene name                    |                             |                             |                             |                              |                              |
|------------------|-------------------------------------|------------------------------|-----------------------------|-----------------------------|-----------------------------|------------------------------|------------------------------|
| Self replication |                                     |                              |                             |                             |                             |                              |                              |
|                  | Ribosomal RNA genes (4)             | <i>rrn4.5<sup>#</sup></i>    | <i>rrn5<sup>#</sup></i>     | <i>rrn 16<sup>#</sup></i>   | <i>rrn23<sup>#</sup></i>    |                              |                              |
|                  |                                     | <i>trnA-UGC<sup>#*</sup></i> | <i>trnC-GCA</i>             | <i>trnD-GUC</i>             | <i>trnE-UUC</i>             | <i>trnF-GAA</i>              | <i>trnJ<sup>#</sup>M-CAU</i> |
|                  |                                     | <i>trnG-GCC<sup>*</sup></i>  | <i>trnG-UCC<sup>*</sup></i> | <i>trnH-GUG<sup>#</sup></i> | <i>trnI-CAU<sup>#</sup></i> | <i>trnI-GAU<sup>#*</sup></i> | <i>trnK-UUU<sup>*</sup></i>  |
|                  | Transfer RNA genes (30)             | <i>trnL-CAA<sup>#</sup></i>  | <i>trnL-UAA<sup>*</sup></i> | <i>trnL-UAG</i>             | <i>trnM-CAU</i>             | <i>trnN-GUU<sup>#</sup></i>  | <i>trnP-UGG</i>              |
|                  |                                     | <i>trnQ-UUG</i>              | <i>trnR-ACG<sup>#</sup></i> | <i>trnR-UCU</i>             | <i>trnS-GCU</i>             | <i>trnS-GGA</i>              | <i>trnS-UGA</i>              |
|                  |                                     | <i>trnT-GGU</i>              | <i>trnT-UGU</i>             | <i>trnV-GAC<sup>#</sup></i> | <i>trnV-UAC<sup>*</sup></i> | <i>trnW-CCA</i>              | <i>trnY-GUA</i>              |
|                  | Small subunit of ribosome (11)      | <i>rps2</i>                  | <i>rps3</i>                 | <i>rps4</i>                 | <i>rps7<sup>#</sup></i>     | <i>rps8</i>                  | <i>rps11</i>                 |
|                  |                                     | <i>rps12<sup>#</sup></i>     | <i>rps14</i>                | <i>rps16</i>                | <i>rps18</i>                | <i>rps19<sup>#</sup></i>     |                              |
|                  | Large subunit of ribosome (9)       | <i>rpl2</i>                  | <i>rpl14</i>                | <i>rpl16</i>                | <i>rpl20</i>                | <i>rpl22<sup>#</sup></i>     | <i>rpl23<sup>#</sup></i>     |
|                  |                                     | <i>rpl32</i>                 | <i>rpl33</i>                | <i>rpl36</i>                |                             |                              |                              |
|                  | DNA-dependent RNA polymerase (4)    | <i>rpoA</i>                  | <i>rpoB</i>                 | <i>rpoC1</i>                | <i>rpoC2</i>                |                              |                              |
|                  | Translational initiation factor (1) | <i>infA</i>                  |                             |                             |                             |                              |                              |
| Photosynthesis   |                                     |                              |                             |                             |                             |                              |                              |
|                  | NADH dehydrogenase (11)             | <i>ndhA</i>                  | <i>ndhB<sup>#</sup></i>     | <i>ndhC</i>                 | <i>ndhD</i>                 | <i>ndhE</i>                  | <i>ndhF</i>                  |
|                  |                                     | <i>ndhG</i>                  | <i>ndhH</i>                 | <i>ndhI</i>                 | <i>ndhJ</i>                 | <i>ndhK</i>                  |                              |
|                  | Photosystem I (7)                   | <i>psaA</i>                  | <i>psaB</i>                 | <i>psaC</i>                 | <i>psaI</i>                 | <i>psaJ</i>                  | <i>ycf3</i>                  |
|                  |                                     | <i>ycf4</i>                  |                             |                             |                             |                              |                              |
|                  |                                     | <i>psbA</i>                  | <i>psbB</i>                 | <i>psbC</i>                 | <i>psbD</i>                 | <i>psbE</i>                  | <i>psbF</i>                  |
|                  | Photosystem II (15)                 | <i>psbH</i>                  | <i>psbI</i>                 | <i>psbJ</i>                 | <i>psbK</i>                 | <i>psbL</i>                  | <i>psbM</i>                  |
|                  |                                     | <i>psbN</i>                  | <i>psbT</i>                 | <i>psbZ</i>                 |                             |                              |                              |
|                  | Cytochrome b/f complex (6)          | <i>petA</i>                  | <i>petB</i>                 | <i>petD</i>                 | <i>petG</i>                 | <i>petL</i>                  | <i>petN</i>                  |
|                  | ATP synthase (6)                    | <i>atpA</i>                  | <i>atpB</i>                 | <i>atpE</i>                 | <i>atpF</i>                 | <i>atpH</i>                  | <i>atpI</i>                  |
|                  | Large subunit of rubisco (1)        | <i>rbcL</i>                  |                             |                             |                             |                              |                              |
| Other genes      |                                     |                              |                             |                             |                             |                              |                              |
|                  | Maturase (1)                        | <i>matK</i>                  |                             |                             |                             |                              |                              |

|                  |                                 |                          |
|------------------|---------------------------------|--------------------------|
|                  | Envelope membrane protein (1)   | <i>cemA</i>              |
|                  | Subunit of acetyl-CoA (1)       | <i>accD</i>              |
|                  | c-type cytochrome synthesis (1) | <i>ccsA</i>              |
|                  | Component of TIC complex (1)    | <i>ycf1</i>              |
|                  | Protease (1)                    | <i>clpP</i>              |
| Unknown function |                                 |                          |
|                  | Conserved ORF (2)               | <i>ycf2</i> <sup>#</sup> |

---

\* denotes Genes with introns; # denotes duplicated genes.

**Table S3.** Distribution of tandem repeats from the chloroplast genomes.

| species             | region                | location        | start  | end    | pattern size | copy num | match percent |     |
|---------------------|-----------------------|-----------------|--------|--------|--------------|----------|---------------|-----|
| <i>P. marmorata</i> | LSC                   | spacer          | 31410  | 31453  | 22           | 2        | 95            |     |
|                     | LSC                   | spacer          | 32132  | 32185  | 27           | 2        | 100           |     |
|                     | LSC                   | spacer          | 32769  | 32894  | 63           | 2        | 100           |     |
|                     | LSC                   | rbcL            | 56647  | 56742  | 48           | 2        | 97            |     |
|                     | LSC                   | accD            | 58650  | 58692  | 6            | 7.2      | 100           |     |
|                     | LSC                   | spacer          | 61066  | 61107  | 21           | 2        | 100           |     |
|                     | LSC                   | spacer          | 68423  | 68494  | 34           | 2.1      | 100           |     |
|                     | IRb                   | spacer          | 87134  | 87249  | 24           | 4.8      | 100           |     |
|                     | IRb                   | ycf1            | 89815  | 89919  | 42           | 2.5      | 98            |     |
|                     | IRb                   | ycf1            | 90042  | 90138  | 45           | 2.2      | 92            |     |
|                     | IRb/SSC               | spacer/ndhF     | 111580 | 111770 | 100          | 1.9      | 100           |     |
|                     | SSC                   | spacer          | 119154 | 119268 | 58           | 2        | 100           |     |
|                     | SSC                   | spacer          | 125022 | 125066 | 19           | 2.3      | 92            |     |
|                     | SSC                   | ycf1            | 126176 | 126345 | 57           | 3        | 99            |     |
|                     | SSC                   | ycf1            | 126748 | 126789 | 21           | 2        | 100           |     |
|                     | SSC                   | ycf1            | 128766 | 128887 | 9            | 13.6     | 99            |     |
|                     | SSC                   | ycf1            | 129463 | 129620 | 30           | 5.1      | 95            |     |
|                     | SSC                   | ycf1            | 129700 | 129740 | 12           | 3.4      | 100           |     |
|                     | IRa                   | ycf2            | 151550 | 151646 | 45           | 2.2      | 92            |     |
|                     | IRa                   | ycf2            | 151769 | 151873 | 42           | 2.5      | 98            |     |
|                     | IRa                   | ycf2            | 154439 | 154554 | 24           | 4.8      | 100           |     |
|                     | <i>P. luquanensis</i> | LSC             | spacer | 8364   | 8416         | 21       | 2.5           | 90  |
|                     |                       | LSC             | spacer | 8742   | 8783         | 21       | 2             | 100 |
| LSC                 |                       | spacer          | 31378  | 31421  | 22           | 2        | 95            |     |
| LSC                 |                       | accD            | 58631  | 58673  | 6            | 7.2      | 100           |     |
| LSC                 |                       | spacer          | 61047  | 61088  | 21           | 2        | 100           |     |
| LSC                 |                       | spacer          | 68404  | 68475  | 34           | 2.1      | 100           |     |
| IRb                 |                       | spacer          | 87110  | 87225  | 24           | 4.8      | 100           |     |
| IRb                 |                       | ycf2            | 90005  | 90101  | 45           | 2.2      | 92            |     |
| IRb                 |                       | spacer          | 109916 | 110049 | 70           | 1.9      | 100           |     |
| SSC                 |                       | spacer          | 125002 | 125064 | 19           | 3.3      | 97            |     |
| SSC                 |                       | ycf1            | 126174 | 126343 | 57           | 3        | 96            |     |
| SSC                 |                       | ycf1            | 126746 | 126787 | 21           | 2        | 100           |     |
| SSC                 |                       | ycf1            | 128738 | 128885 | 9            | 16.4     | 100           |     |
| SSC                 |                       | ycf1            | 129466 | 129630 | 30           | 5.3      | 95            |     |
| SSC                 |                       | ycf1            | 129710 | 129750 | 12           | 3.4      | 100           |     |
| IRa                 |                       | spacer          | 129710 | 131756 | 70           | 1.9      | 100           |     |
| IRa                 |                       | ycf2            | 151571 | 151667 | 45           | 2.2      | 92            |     |
| IRa                 |                       | ycf2            | 151790 | 151894 | 42           | 2.5      | 98            |     |
| IRa                 |                       | spacer/trnI-CAU | 154447 | 154562 | 24           | 4.8      | 100           |     |

**Table S4.** Distribution of dispersed, forward and inverted/palindromic repeats from chloroplast genomes.

| Species               | Repeats  | LSC                              | IRb                                                                  | SSC                                                      | IRa                                        |
|-----------------------|----------|----------------------------------|----------------------------------------------------------------------|----------------------------------------------------------|--------------------------------------------|
| <i>P. marmorata</i>   | num      | 1                                | 10                                                                   | 11                                                       | 8                                          |
|                       | size     | 63                               | 66-106                                                               | 68-116                                                   | 68-126                                     |
|                       | location | intergenic spacer <sub>(1)</sub> | intergenic spacer <sub>(2)</sub><br>ycf1 <sup>Ψ</sup> <sub>(8)</sub> | intergenic spacer <sub>(1)</sub><br>ycf1 <sub>(10)</sub> | ycf1 <sub>(6)</sub><br>ycf2 <sub>(2)</sub> |
| <i>P. luquanensis</i> | num      | 0                                | 10                                                                   | 12                                                       | 8                                          |
|                       | size     | -                                | 64-126                                                               | 67-139                                                   | 68-126                                     |
|                       | location | -                                | intergenic spacer <sub>(3)</sub><br>ycf1 <sup>Ψ</sup> <sub>(7)</sub> | ycf1 <sub>(12)</sub>                                     | ycf1 <sub>(6)</sub><br>ycf2 <sub>(2)</sub> |

<sup>Ψ</sup> indicates a pseudogene.

**Table S5.** Type and number of SSRs in the chloroplast genomes.

| SSRs                           | Mono  | Di    | Tri     | Tetra     | Penta       | Hexa          | Total         |
|--------------------------------|-------|-------|---------|-----------|-------------|---------------|---------------|
| <i>P. marmorata</i>            |       |       |         |           |             |               |               |
| Total Counts                   | 62    | 22    | 9       | 20        | 7           | 8             | 128           |
| Total Repeat Length (bp)       | 671   | 286   | 117     | 292       | 115         | 192           | 1673          |
| Density (bp/kb)                | 4.26  | 1.81  | 0.74    | 1.85      | 0.73        | 1.22          | 10.61         |
| Proportion among other SSR (%) | 40.11 | 17.10 | 6.99    | 17.45     | 6.87        | 11.48         | 100           |
| Mean Length (bp)               | 10.82 | 13.00 | 13.00   | 14.60     | 16.43       | 24.00         | 13.07         |
| Type of SSR motifs             |       |       |         | AAAG/CTTT |             | AAAGAG/CTCTTT |               |
|                                |       |       |         | AAAT/ATTT |             | AAAGCG/CGCTTT |               |
|                                |       |       |         | AAGG/CCTT |             | AAATAT/ATATTT |               |
|                                |       | AC/GT | AAG/CTT | AATC/ATTG | AAATG/ATTTC | AAATCC/ATTTGG |               |
|                                |       | A/T   | AG/CT   | AAT/ATT   | AATG/ATTC   | AATAC/ATTGT   | AAGAGG/CCTCTT |
|                                |       | C/G   | AT/AT   | ACT/AGT   | AGAT/ATCT   | AATAT/ATATT   | AATGAC/ATTGTC |
|                                |       |       |         |           |             |               |               |
| <i>P. luquanensis</i>          |       |       |         |           |             |               |               |
| Total Counts                   | 59    | 26    | 8       | 20        | 7           | 10            | 130           |
| Total Repeat Length (bp)       | 651   | 306   | 105     | 292       | 106         | 246           | 1706          |
| Density (bp/kb)                | 4.13  | 1.94  | 0.67    | 1.85      | 0.67        | 1.56          | 10.82         |
| Proportion among other SSR (%) | 38.16 | 17.94 | 6.15    | 17.12     | 6.21        | 14.42         | 100           |
| Mean Length (bp)               | 11.03 | 11.77 | 13.13   | 14.60     | 15.14       | 24.60         | 13.12         |
| Type of SSR motifs             |       |       |         | AAAG/CTTT |             | AAAGAG/CTCTTT |               |
|                                |       |       |         | AAAT/ATTT |             | AAAGCG/CGCTTT |               |
|                                |       | AC/GT | AAG/CTT | AAGG/CCTT | AAATG/ATTTC | AAATAT/ATATTT |               |
|                                |       | A/T   | AG/CT   | AAT/ATT   | AATG/ATTC   | AATAC/ATTGT   | AAATCC/ATTTGG |
|                                |       | C/G   | AT/AT   | ACT/AGT   | AGAT/ATCT   | AATAT/ATATT   | AAGAGG/CCTCTT |
|                                |       |       |         |           |             |               |               |
|                                |       |       |         |           |             |               |               |

AATACT/AGTATT  
AATGAC/ATTGTC  
ACACAT/ATGTGT

---
