# Supplementary material for: Comparative chloroplast genomes of Paris Sect. Marmorata: insights into repeat regions and evolutionary implications
Source: PubMed Central journal article supplement (PMC6311911; doi:10.1186/s12864-018-5281-x), 2018-12-31
Supplement: 12864_2018_5281_MOESM2_ESM.pdf [file 12864_2018_5281_MOESM2_ESM.pdf]

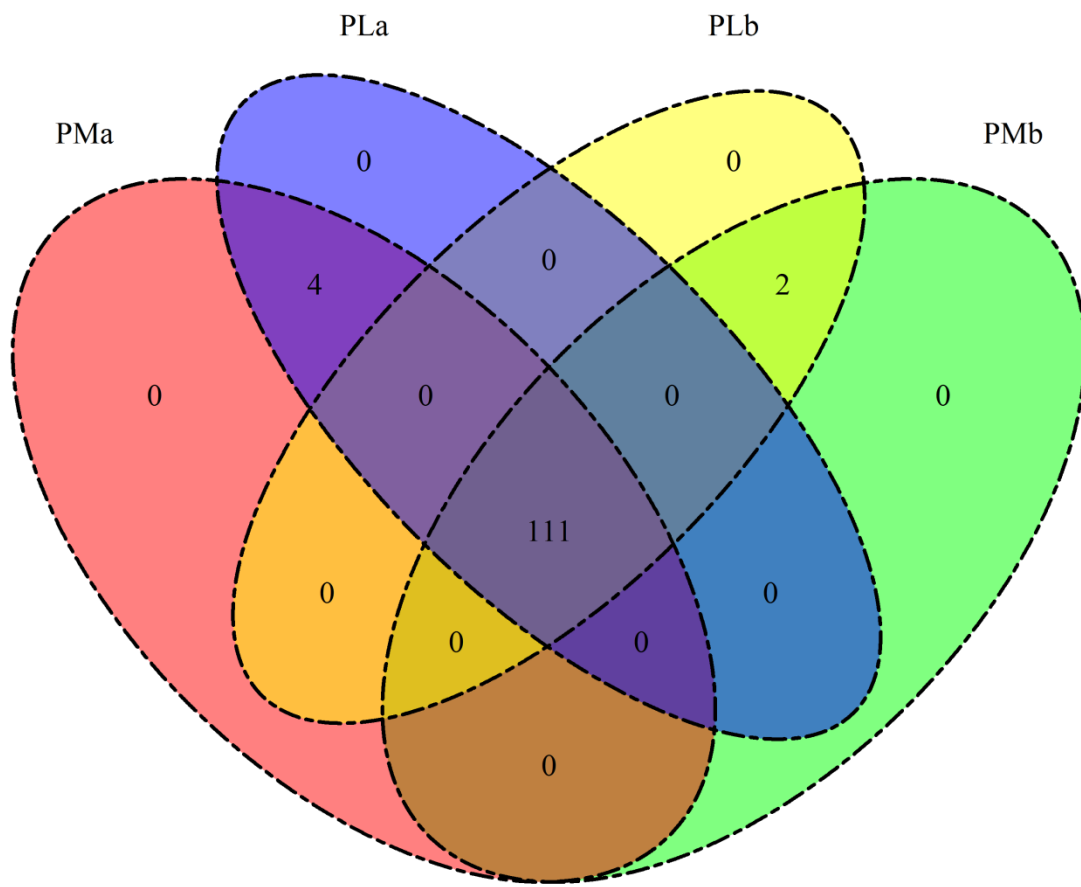

**Figure S1** Venn diagram analysis for gene composition from chloroplast genomes of *Sect. Marmorata* via different assembly methods and reference genomes.

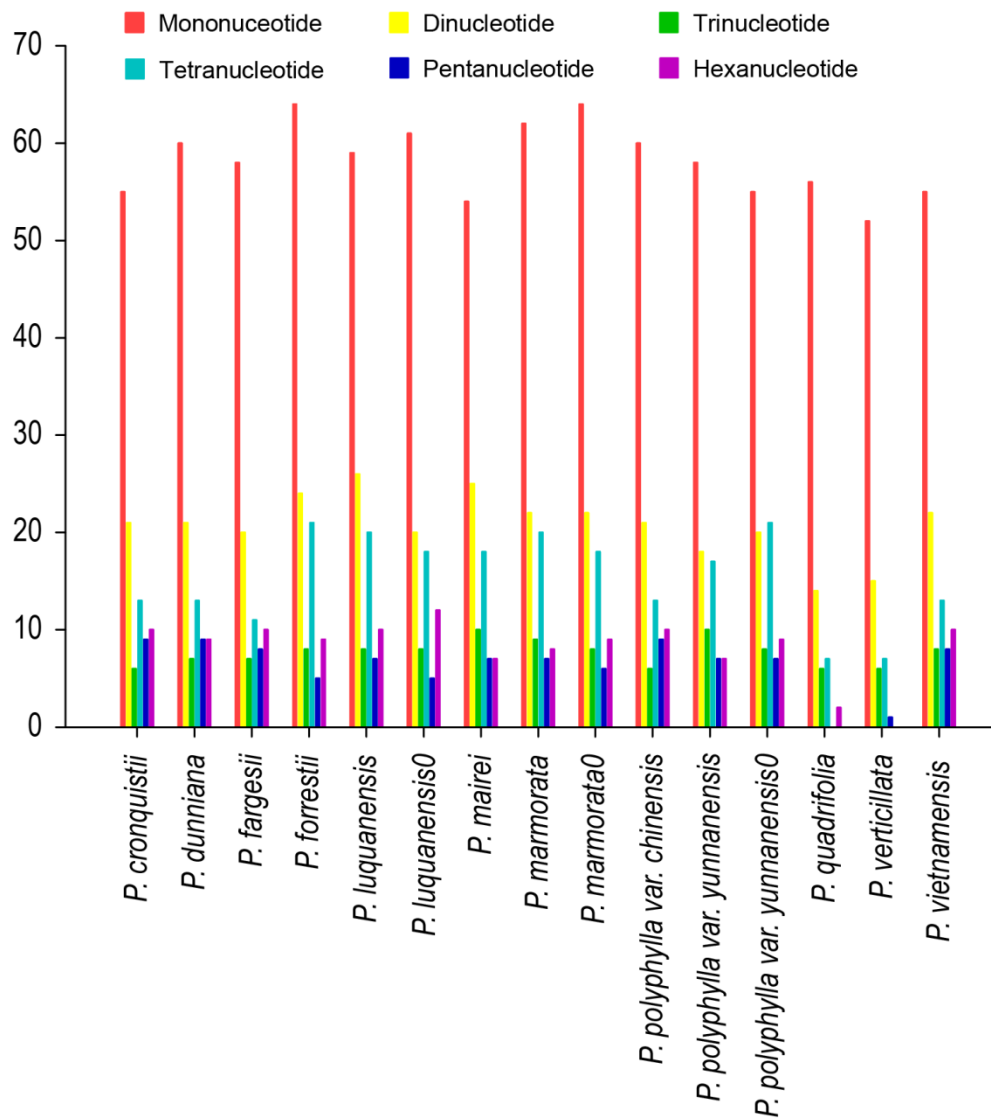

**Figure S2** Six kinds of SSR motifs in fifteen *Paris* chloroplast genomes. *P. polyphylla* var. *yunnanensis0* was sequenced by Song *et al* (2015). *P. marmorata0*, *P. luquanensis0*, *P. polyphylla* var. *yunnanensis* were sequenced by Huang *et al* (2016). *P. marmorata* and *P. luquanensis* were sequenced in this study.

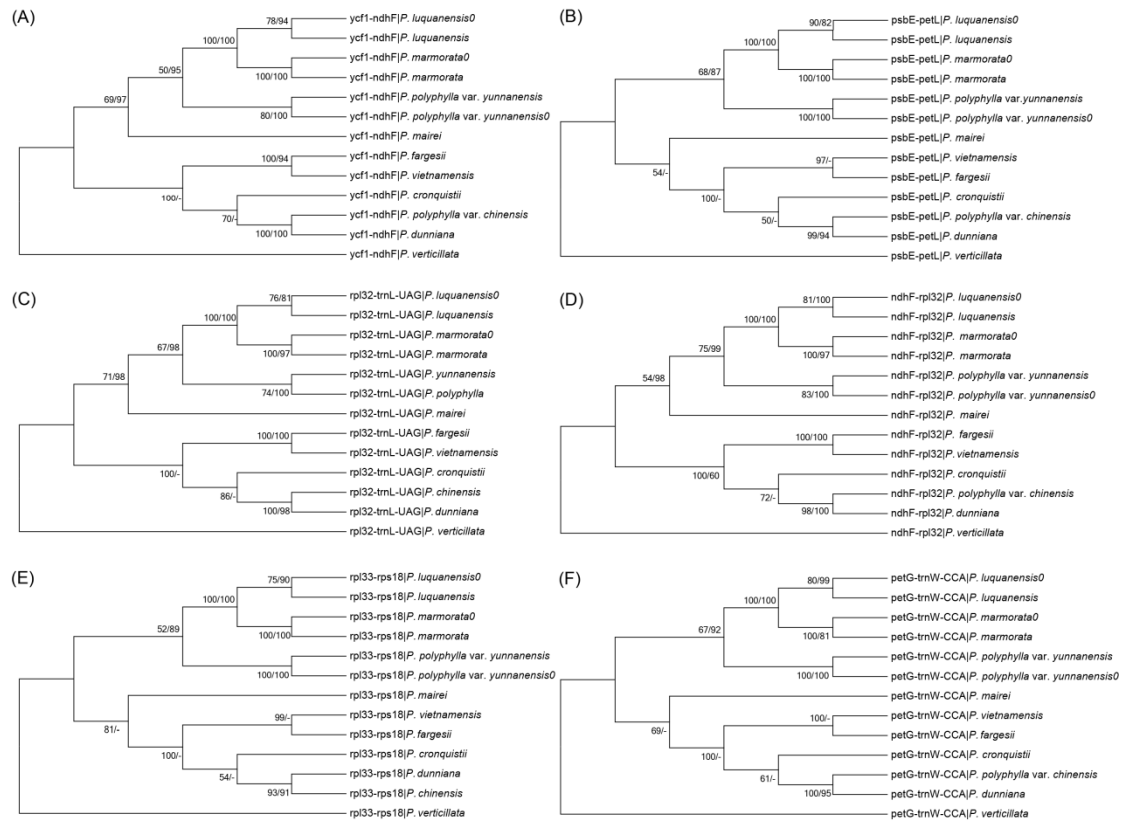

**Figure S3.** Phylogenetic trees of genes spacer regions harbored repeat sequence, using NJ (bootstrap values on the left of slashes) and ML (bootstrap values on the right of slashes) algorithms.

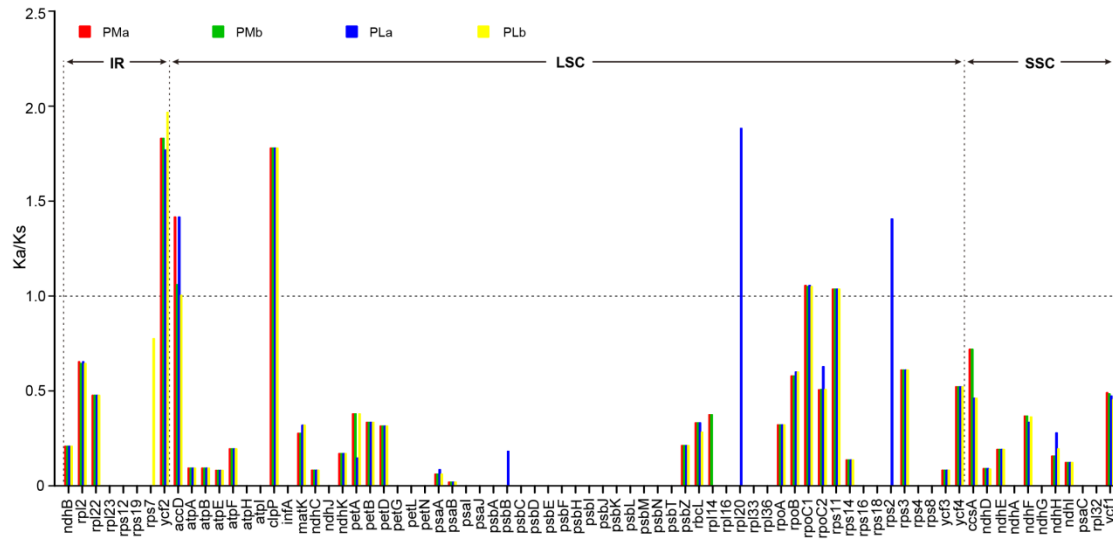

**Figure S4.** The  $K_a/K_s$  ratios of 71 protein-coding genes from chloroplast genome of *Sect. Marmorata*. Red bars and blue bars denote *P. marmorata* (PMA) and *P. luquanensis* (PLA) sequenced previously; green bars and yellow bars denote *P. marmorata* (PMB) and *P. luquanensis* (PLB) sequenced in this study.

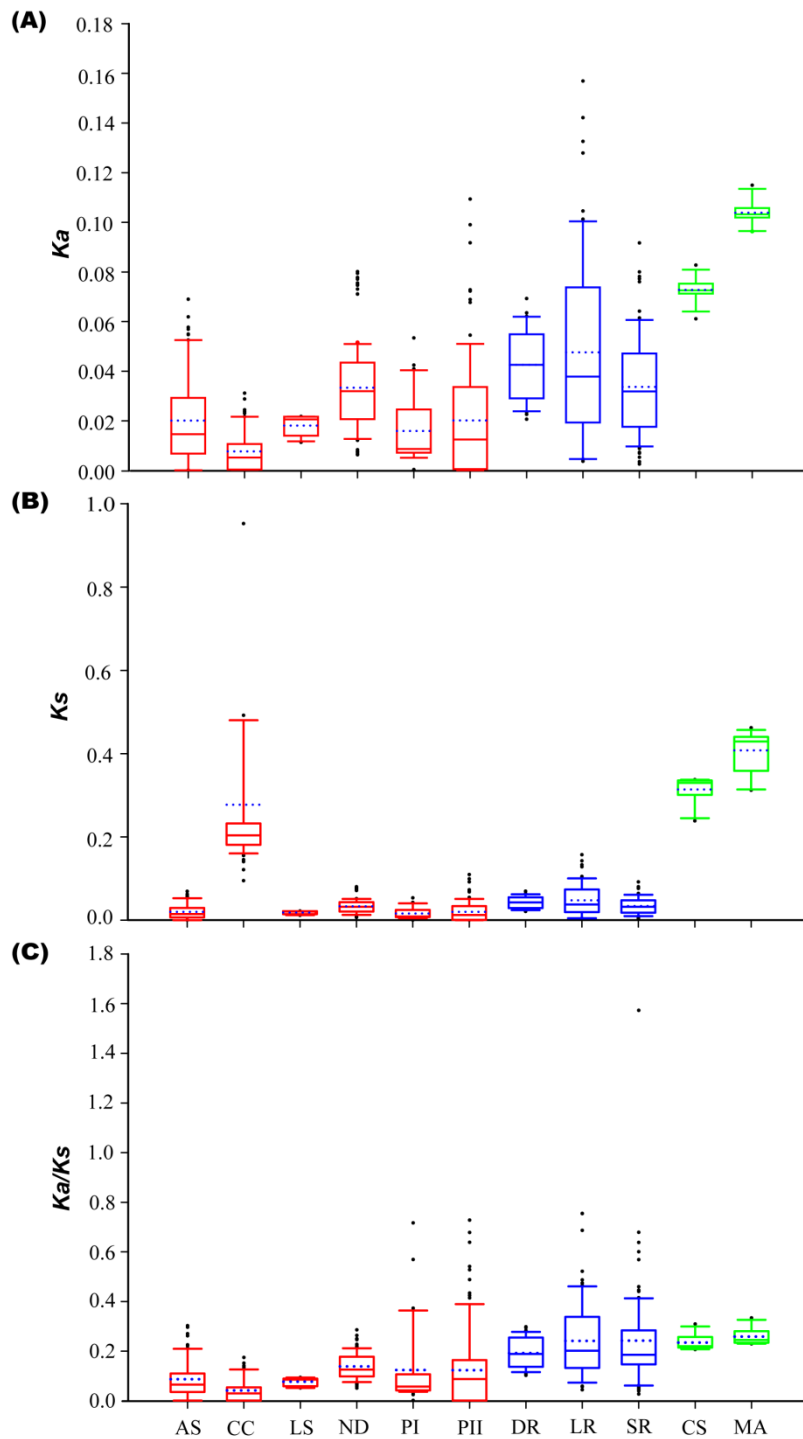

**Figure S5** Comparison of  $K_a$ ,  $K_s$ , and  $K_a/K_s$  ratios of *Sect. Marmorata* chloroplast genes. (A-C) denote  $K_a$ ,  $K_s$ , and  $K_a/K_s$ , respectively. Red highlight boxplots indicate photosynthesis genes, green ones indicate genes involved in self-replication, and blue ones indicate other genes. SR: small subunit of ribosome, LR: large subunit of ribosome, DR: DNA-dependent RNA, TF: translational initiation factor, ND: NAPH dehydrogenase, PI: photosystem I, PII: photosystem II, CC: cytochrome b/f complex, AS: ATP synthase gene, LS: large subunit of rubisco, SA: subunit of acetyl-CoA, CS: cytochrome synthesis, CT: c-type cytochrome synthesis, PR: protease, MA: maturase, CO: conserved ORF.
